# Supplementary material for: Polymer-templated synthesis of hollow Pd–CeO2nanocomposite spheres and their catalytic activity and thermal stability
Source: Royal Society of Chemistry journal article supplement (doi:10.1039/c5ta05092h), 2015-01-01
Supplement: c5ta05092h1.pdf [file c5ta05092h1.pdf]

## Supporting Information:

# Polymer-templated synthesis of hollow Pd-CeO<sub>2</sub> nanocomposite spheres and its catalytic activity and thermal stability

Chenhao Du, Yun Guo, Yanglong Guo, Xue-qing Gong, Guanzhong Lu\*

Key Laboratory for Advanced Materials and Research Institute of Industrial Catalysis, East China University of Science and Technology, Shanghai 200237, P. R. China.

\* Corresponding author: Fax: +86-21-64252923, E-mail: gzhlu@ecust.edu.cn (G.Z. Lu)

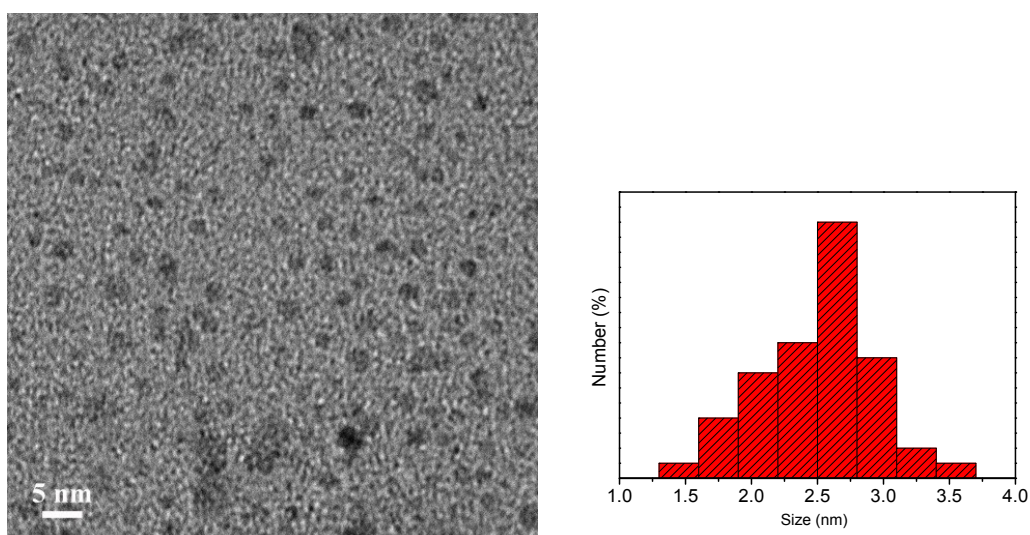

**Figure S1.** TEM image of PVP-protected Pd NPs and its size distribution profile.

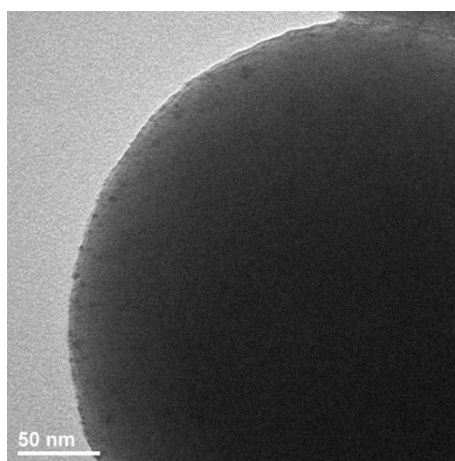

**Figure S2.** TEM image of Pd NPs loaded on resin polymer sphere.

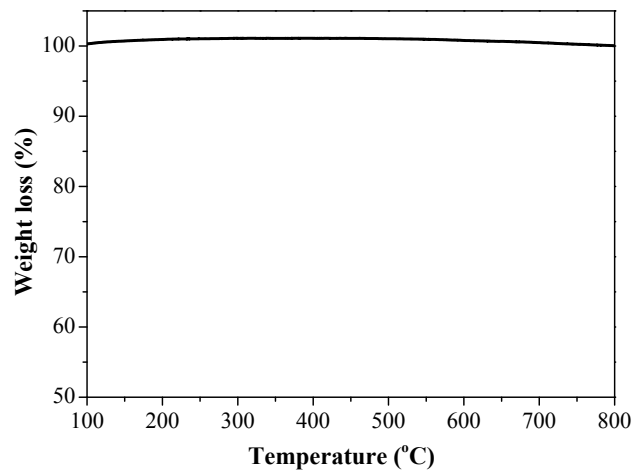

**Figure S3.** TG curve of the hollow Pd-CeO<sub>2</sub> nanocomposite spheres.

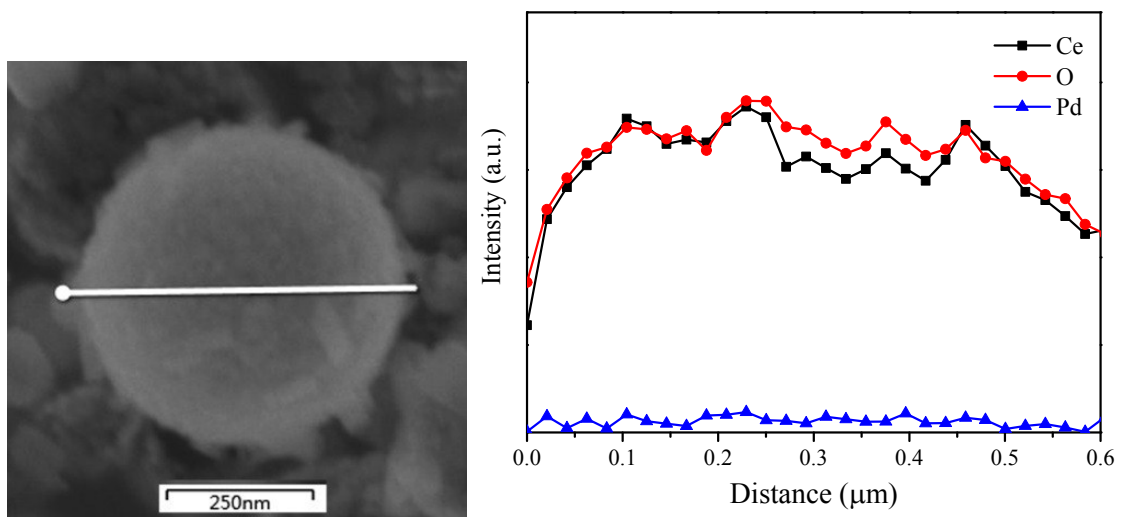

**Figure S4.** EDS line-scanning profile across individual h-Pd-CeO<sub>2</sub> NCSs.

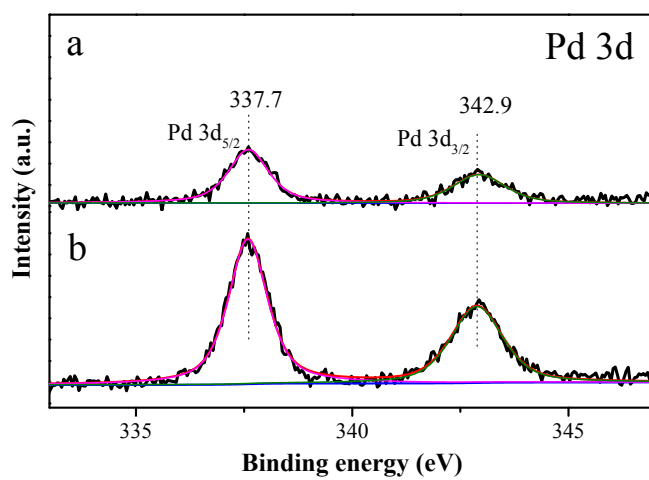

**Figure S5.** Pd 3d XPS spectra of hollow Pd-CeO<sub>2</sub> nanocomposite spheres calcined at (a) 500 °C and (b) 700 °C.

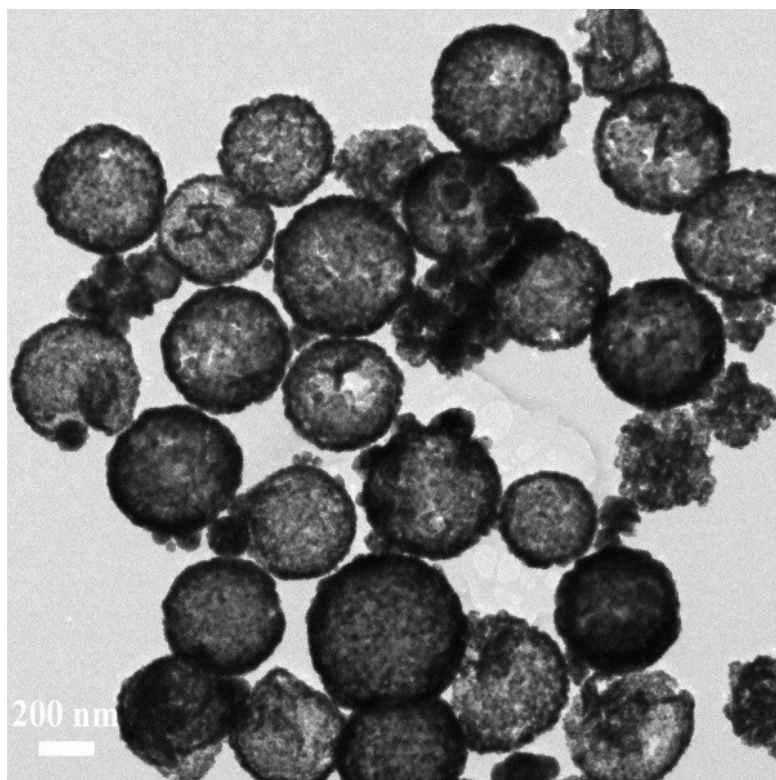

**Figure S6.** TEM image of h-Pd-CeO<sub>2</sub> NCSs reduced by NaBH<sub>4</sub> then treated at 650 °C for 4 h in N<sub>2</sub>.

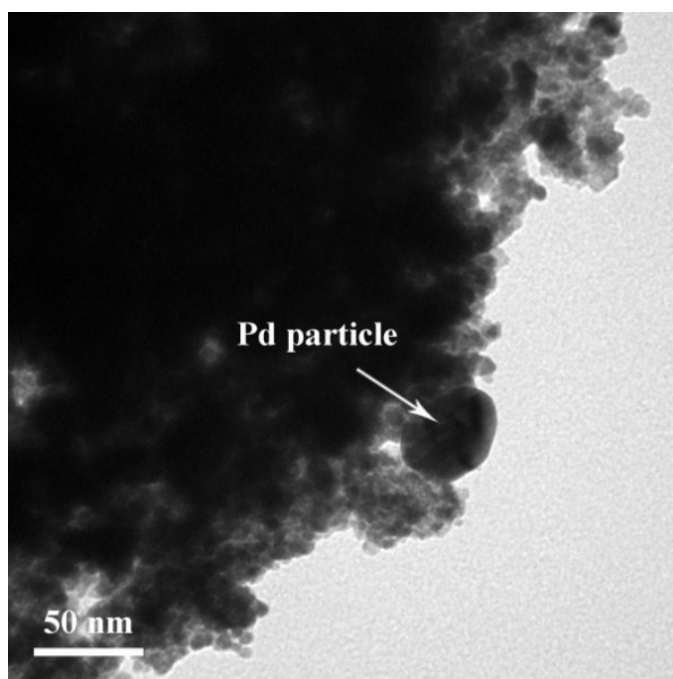

**Figure S7.** TEM images of physical mixture of Pd + CeO<sub>2</sub> calcined at 500 °C.

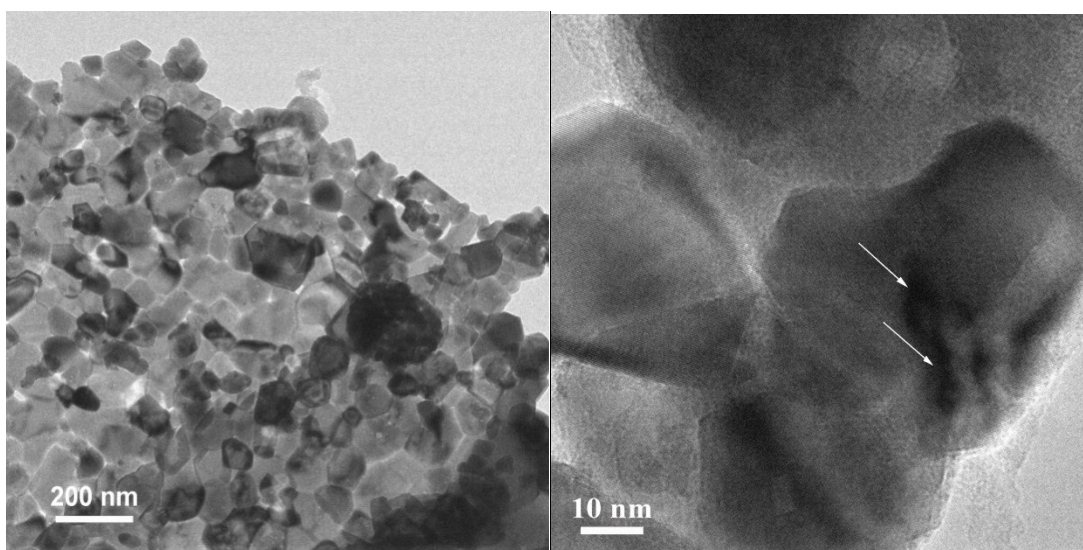

**Figure S8.** TEM images of Pd/CeO<sub>2</sub>-imp calcined at 500 °C. (White arrows indicate the formation of PdO species).

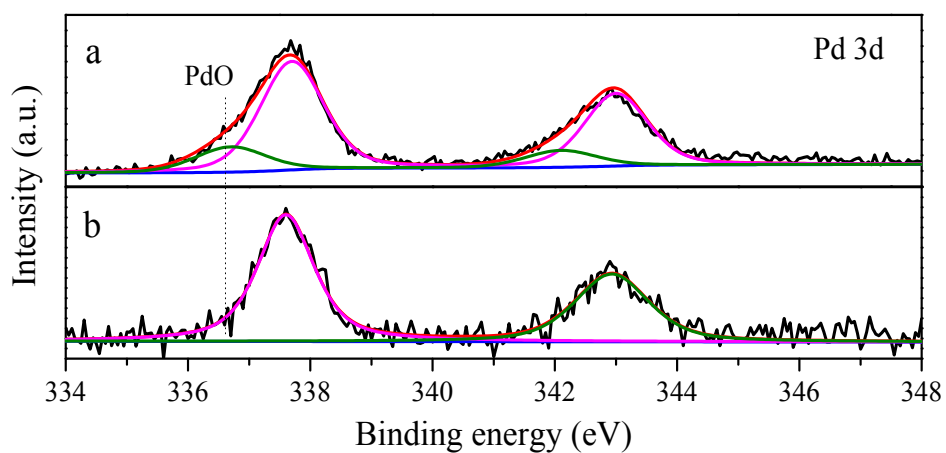

**Figure S9.** Pd 3d XPS spectra of (a) Pd/CeO<sub>2</sub>-imp and (b) Pd-CeO<sub>2</sub> NCSs samples.

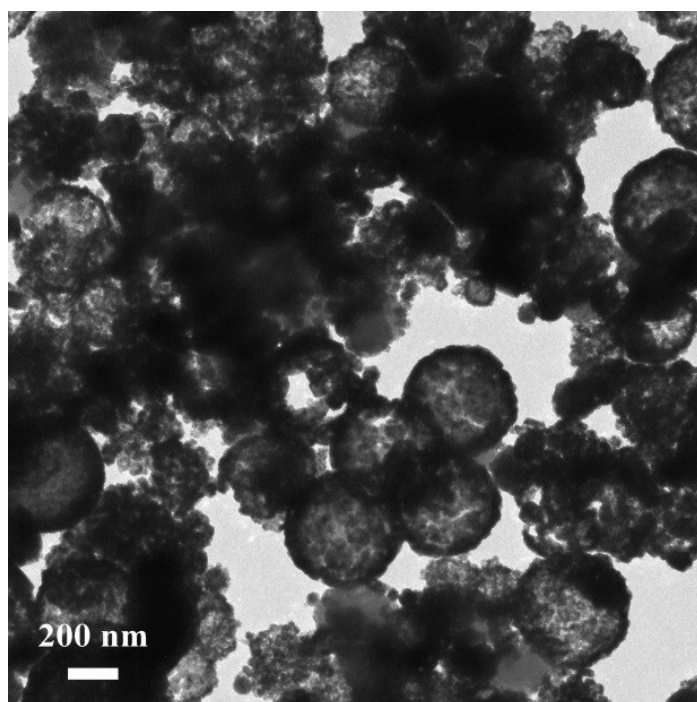

**Figure S10.** TEM image of h-Pd-CeO<sub>2</sub> NCSs after 5 cycles of 4-NP reduction reaction.

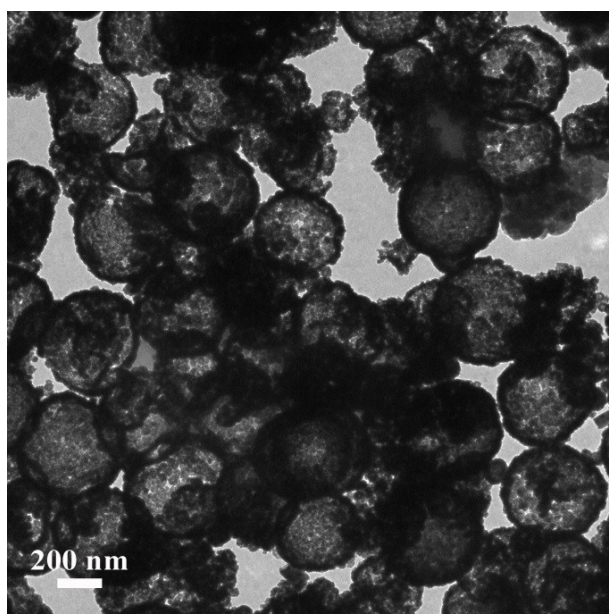

**Figure S11.** TEM image of h-Pd-CeO<sub>2</sub> NCSs after cycled treatment in CO oxidation reaction.

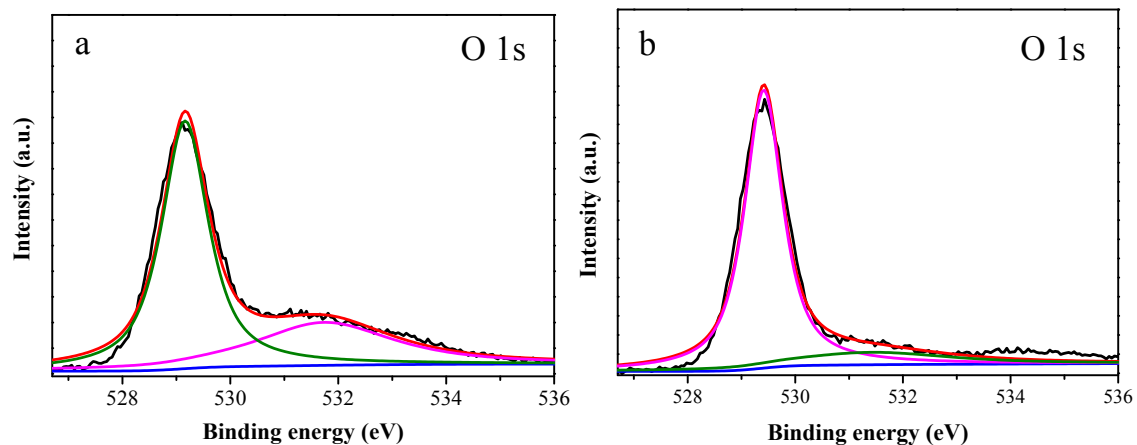

**Figure S12.** O1s XPS spectra of (a) hollow Pd-CeO<sub>2</sub> nanocomposite spheres and (b) supported Pd/CeO<sub>2</sub> catalyst.

**Table S1.** BET surface area ( $S_{\text{BET}}$ ), pore volume and crystallite sizes of the catalysts.

| Catalyst                      | $S_{\text{BET}}$ (m <sup>2</sup> /g) | Pore volume (cm <sup>3</sup> /g) | Crystallite size (nm) |
|-------------------------------|--------------------------------------|----------------------------------|-----------------------|
| h-Pd-CeO <sub>2</sub> -773K   | 59.3                                 | 0.14                             | 5-10                  |
| h-Pd-CeO <sub>2</sub> -973K   | 33.9                                 | 0.11                             | 10-15                 |
| Pd/CeO <sub>2</sub> -imp-773K | 9.3                                  | -                                | bulk                  |
| Pd/CeO <sub>2</sub> -imp-973K | 9.1                                  | -                                | bulk                  |
